# Supplementary material for: High-quality spinel LiCoTiO4single crystals with co-exposed {111} and {110} facets: flux growth, formation mechanism, magnetic behavior and their application in photocatalysis
Source: Royal Society of Chemistry journal article supplement (doi:10.1039/c6ce01394e), 2016-01-01
Supplement: c6ce01394e1.pdf [file c6ce01394e1.pdf]

**Electronic Supplementary Information (ESI)**

**High-quality spinel  $\text{LiCoTiO}_4$  single crystals co-exposed  $\{111\}$  and  $\{110\}$  facets: flux growth, formation mechanism, magnetic behavior and their application in photocatalysis**

*Qiang Wang, Qingjun Guo, Yuanhao Hu, Bing Li\**

School of Mechanical and Power Engineering, East China University of Science and Technology, 130 Meilong Road, Shanghai 200237, P. R. China.

**\*E-mail:** bingli@ecust.edu.cn.

## Experimental section

### Preparation of $\text{LiCoTiO}_4/\text{g-C}_3\text{N}_4$ composite photocatalysts

Melamine (analytical grade purity) was purchased from Sinopharm Chemical Reagent Co., Ltd. and used without further purification. Deionized water was used throughout.

In a typical synthesis run, different amounts of the flux-grown  $\text{LiCoTiO}_4$  powder (LCTO-1 sample) with a suitable amount of melamine were dispersed in 100 ml water by ultrasonication for 30 min and then the suspension was continuously stirred for 6 h at room temperature. After that, the precipitate was collected by centrifugation and dried at 80 °C in an oven for 12 h. Finally, the obtained mixture was putted into an electric furnace and then calcined at 550 °C for 4 h in air to obtain  $\text{g-C}_3\text{N}_4$  phase and make a firm connection between  $\text{LiCoTiO}_4$  and  $\text{g-C}_3\text{N}_4$  products. The as-prepared  $\text{LiCoTiO}_4/\text{g-C}_3\text{N}_4$  composite samples with expected  $\text{LiCoTiO}_4$  contents of 0.1, 0.5, 1.0 and 5.0 wt % were labeled as LCTO/CN-0.1, LCTO/CN-0.5, LCTO/CN-1.0 and LCTO/CN-5.0, respectively. As a reference, pure  $\text{g-C}_3\text{N}_4$  was prepared by directly heating melamine at 550 °C for 4 h at a heating rate of 2 °C/ min in a semi-closed alumina crucible. After heating treatment, the yellow products were collected and ground into powders.

**Table S1 Comparative study of the diffraction data for the synthesized LiCoTiO<sub>4</sub> samples.**

| hkl | interplanar spacings (d/ Å) <sup>a</sup> |        |        |        |
|-----|------------------------------------------|--------|--------|--------|
|     | LiCoTiO <sub>4</sub>                     | Sample | Sample | Sample |
|     | PDF No. 38-0182                          | LCTO-1 | LCTO-2 | LCTO-3 |
| 111 | 4.8800                                   | 4.8497 | 4.8596 | 4.8398 |
| 220 | 2.9780                                   | 2.9725 | 2.9747 | 2.9656 |
| 311 | 2.5370                                   | 2.5341 | 2.5352 | 2.5284 |
| 222 | 2.4320                                   | 2.4301 | 2.4307 | 2.4235 |
| 400 | 2.1050                                   | 2.1017 | 2.1021 | 2.0972 |
| 422 | 1.7180                                   | 1.7139 | 1.7167 | 1.7126 |
| 511 | 1.6189                                   | 1.6169 | 1.6180 | 1.6143 |
| 440 | 1.4868                                   | 1.4856 | 1.4865 | 1.4831 |
| 620 | 1.3303                                   | 1.3288 | 1.3297 | 1.3274 |
| 533 | 1.2834                                   | 1.2815 | 1.2821 | 1.2796 |
| 444 | 1.2144                                   | 1.2119 | 1.2138 | 1.2103 |

<sup>a</sup>Note: determined from the strong and medium lines of XRD patterns.

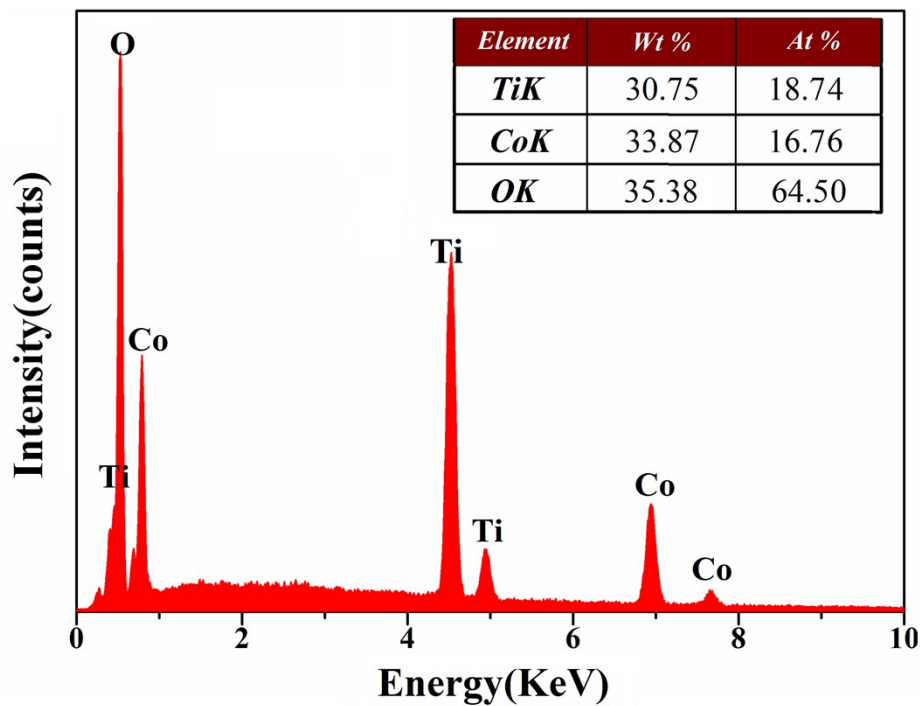

**Fig. S1** EDS spectra of as-synthesized sample LCTO-1 and the light Li element can't be detected.

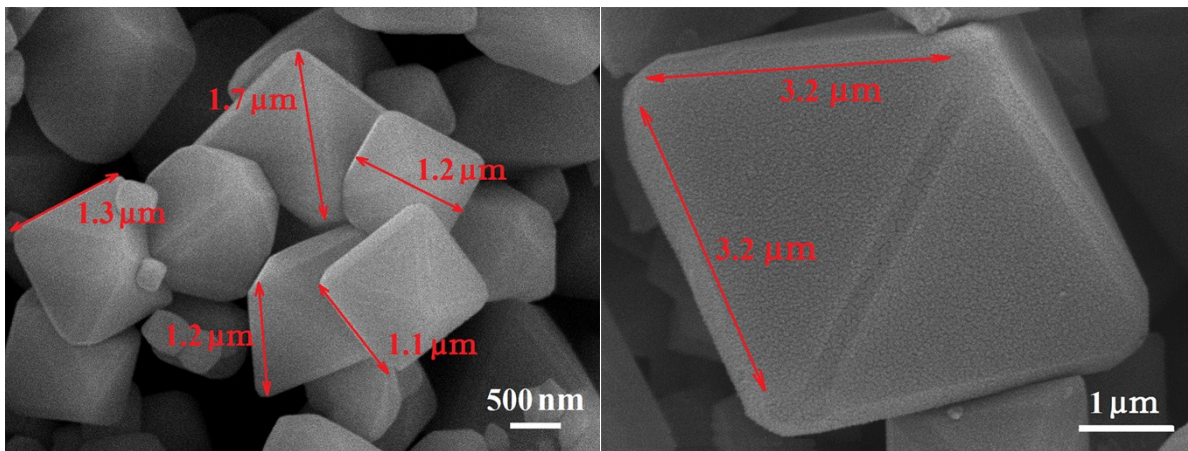

**Fig. S2** SEM images of the as-synthesized sample LCTO-1.

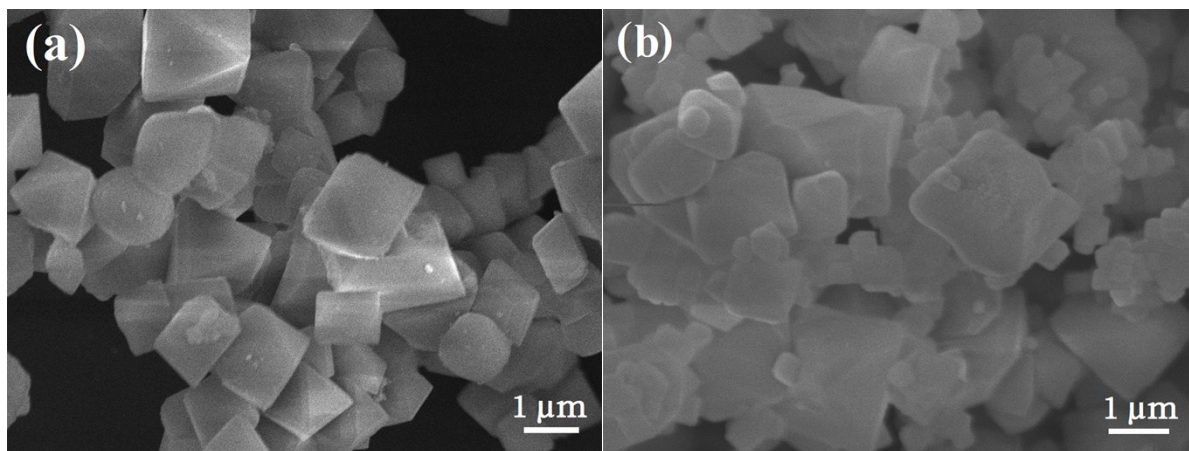

**Fig. S3** SEM images of the as-synthesized sample LCTO-2 (a) and LCTO-3 (b).

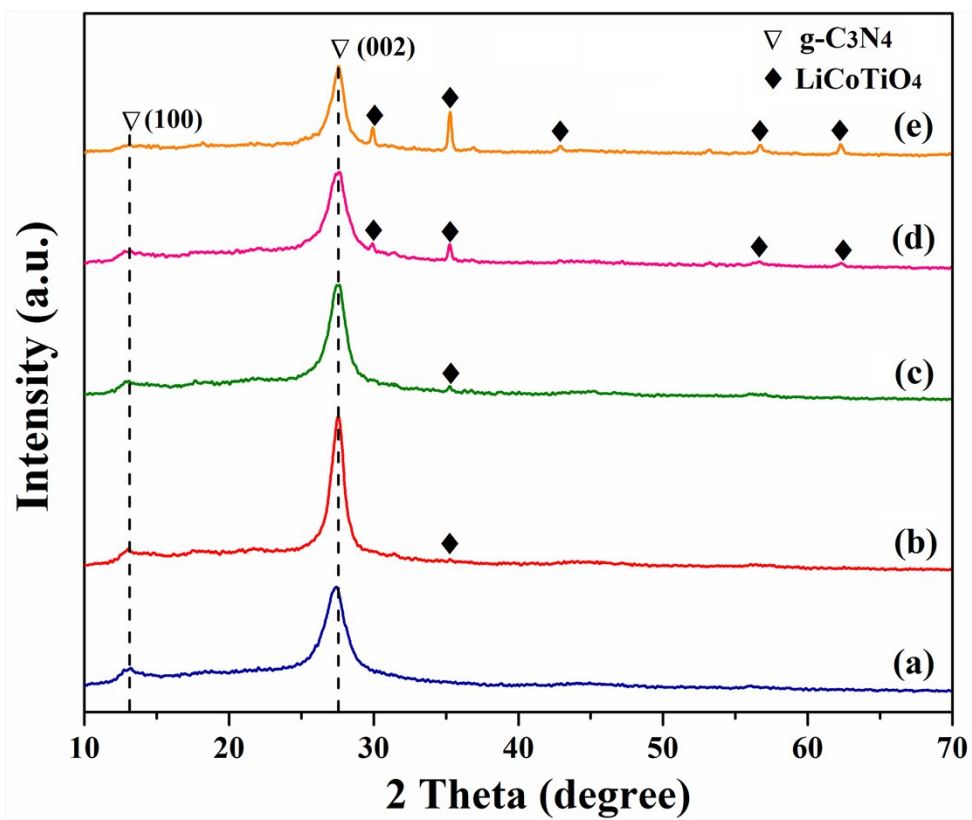

**Fig. S4** XRD patterns of pure g-C<sub>3</sub>N<sub>4</sub> (a), LCTO/CN-0.1 (b), LCTO/CN-0.5 (c), LCTO/CN-1.0 (d) and LCTO/CN-5.0 (e).

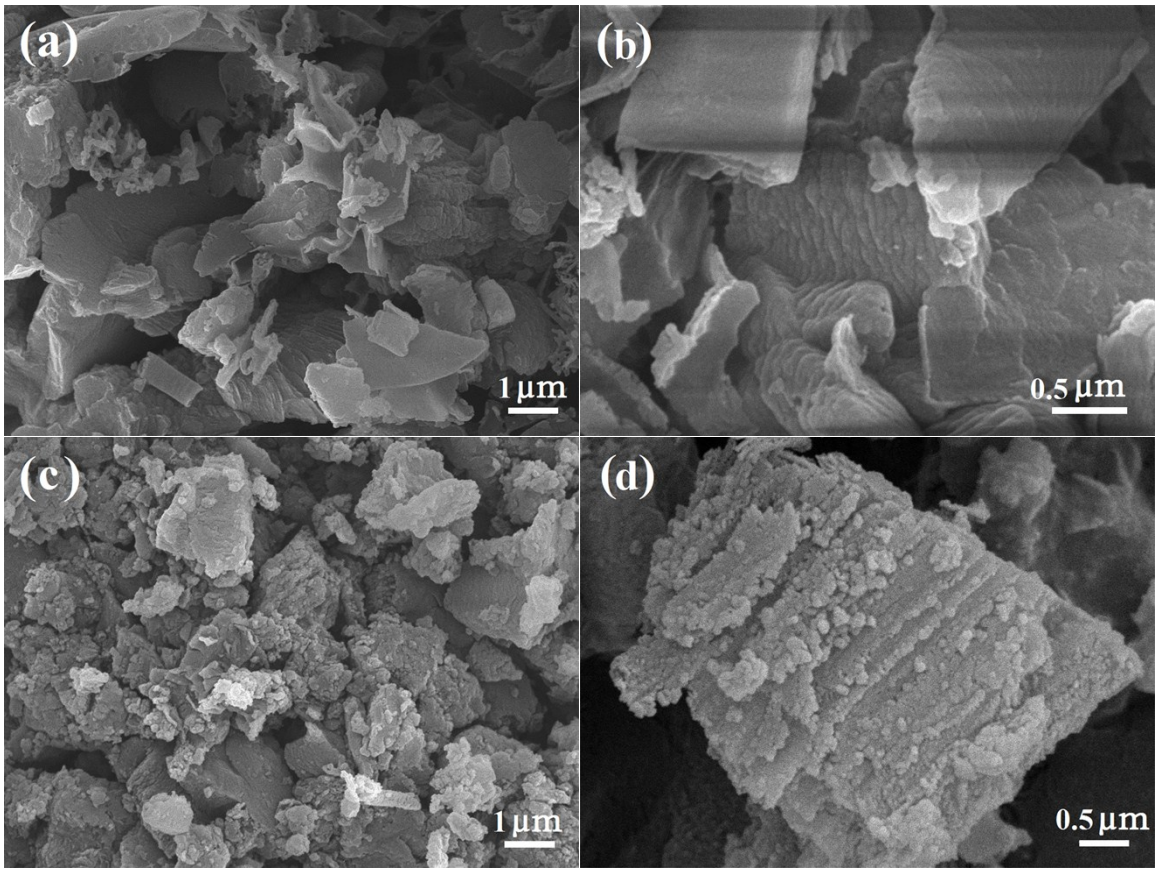

**Fig. S5** SEM images of pure g-C<sub>3</sub>N<sub>4</sub> (a, b) and the LCTO/CN-0.5 composite sample (c, d).



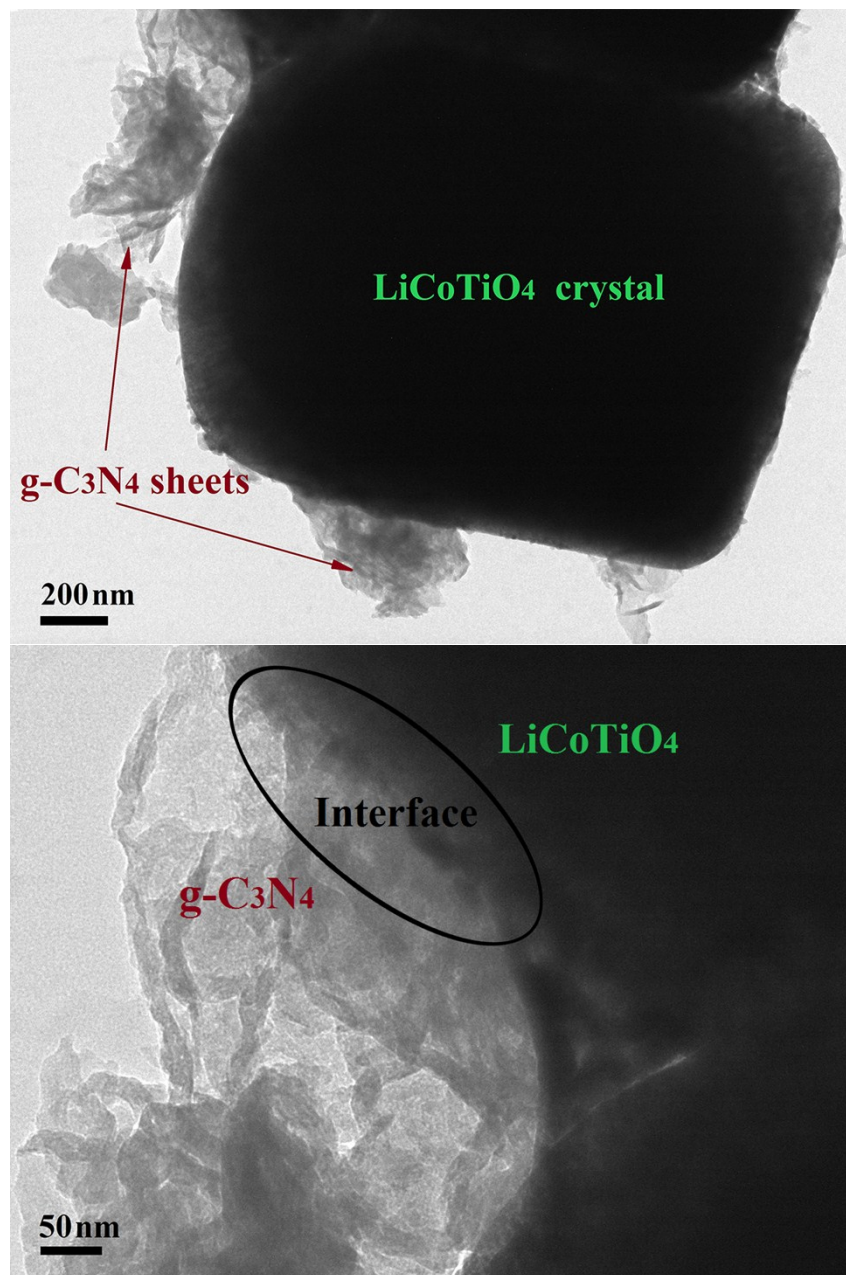

**Fig. S6** TEM images of the LCTO/CN-0.5 composite sample.

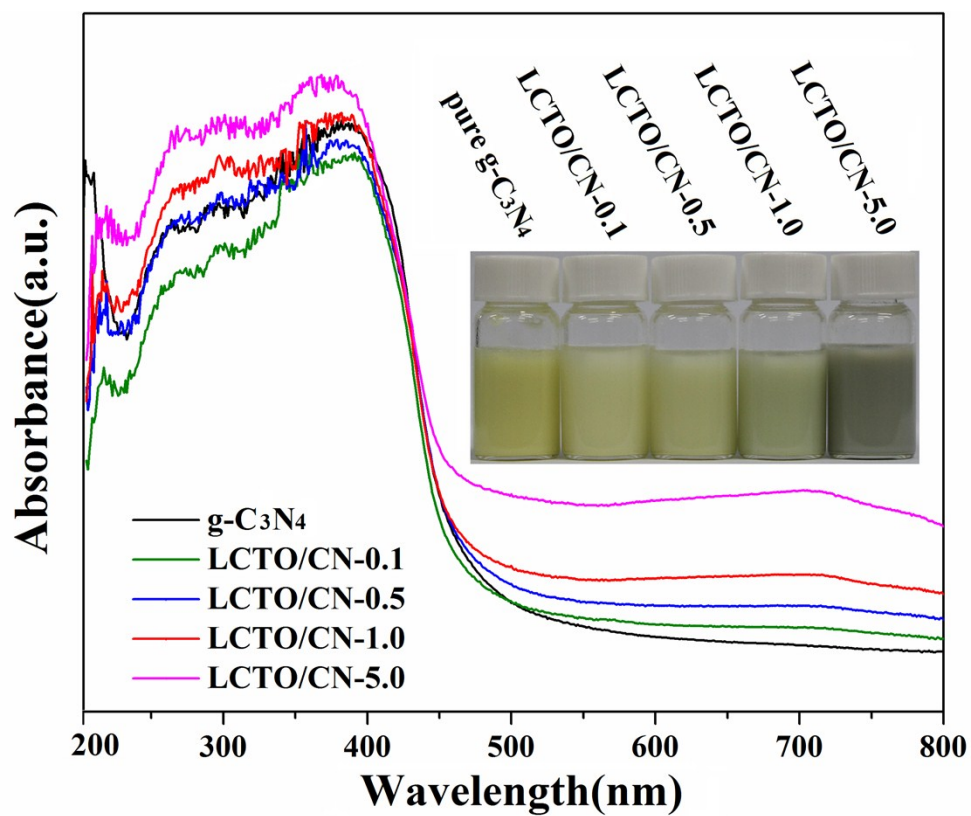

**Fig. S7** UV-vis diffuse reflectance spectra of the LiCoTiO<sub>4</sub>/g-C<sub>3</sub>N<sub>4</sub> composites and pure g-C<sub>3</sub>N<sub>4</sub>. Inset shows the photographs of stable dispersions in water of the samples.

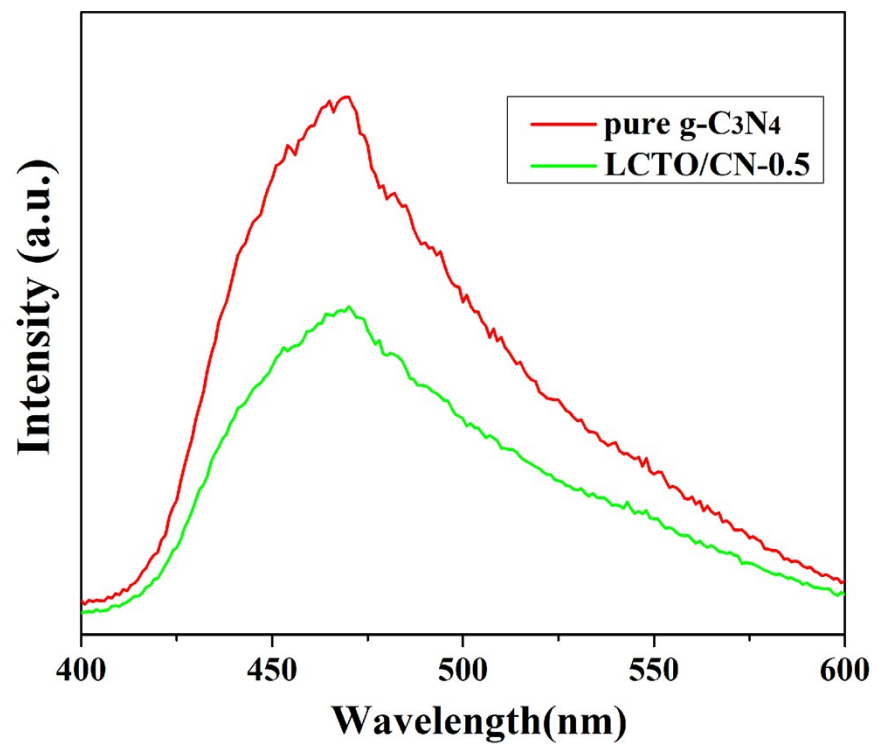

**Fig. S8** Photoluminescence (PL) emission spectra of the pure g-C<sub>3</sub>N<sub>4</sub> and LCTO/CN-0.5 sample.
